# Supplementary material for: Tuning reactivity in trimetallic dual-atom alloys: molecular-like electronic states and ensemble effects
Source: Royal Society of Chemistry journal article supplement (doi:10.1039/d2sc03650a), 2022-01-01
Supplement: d2sc03650a1.pdf [file d2sc03650a1.pdf]

## **Supplementary Material for: “Tuning reactivity in trimetallic dual-atom alloys: Molecular-like electronic states and ensemble effects”**

Shengjie Zhang,<sup>1</sup> E. Charles H. Sykes,<sup>2</sup> Matthew M. Montemore<sup>1\*</sup>

<sup>1</sup> Department of Chemical and Biomolecular Engineering, Tulane University, New Orleans, LA

70118, USA

<sup>2</sup> Department of Chemistry, Tufts University, Medford, MA 02155, USA

\*[mmontemore@tulane.edu](mailto:mmontemore@tulane.edu)

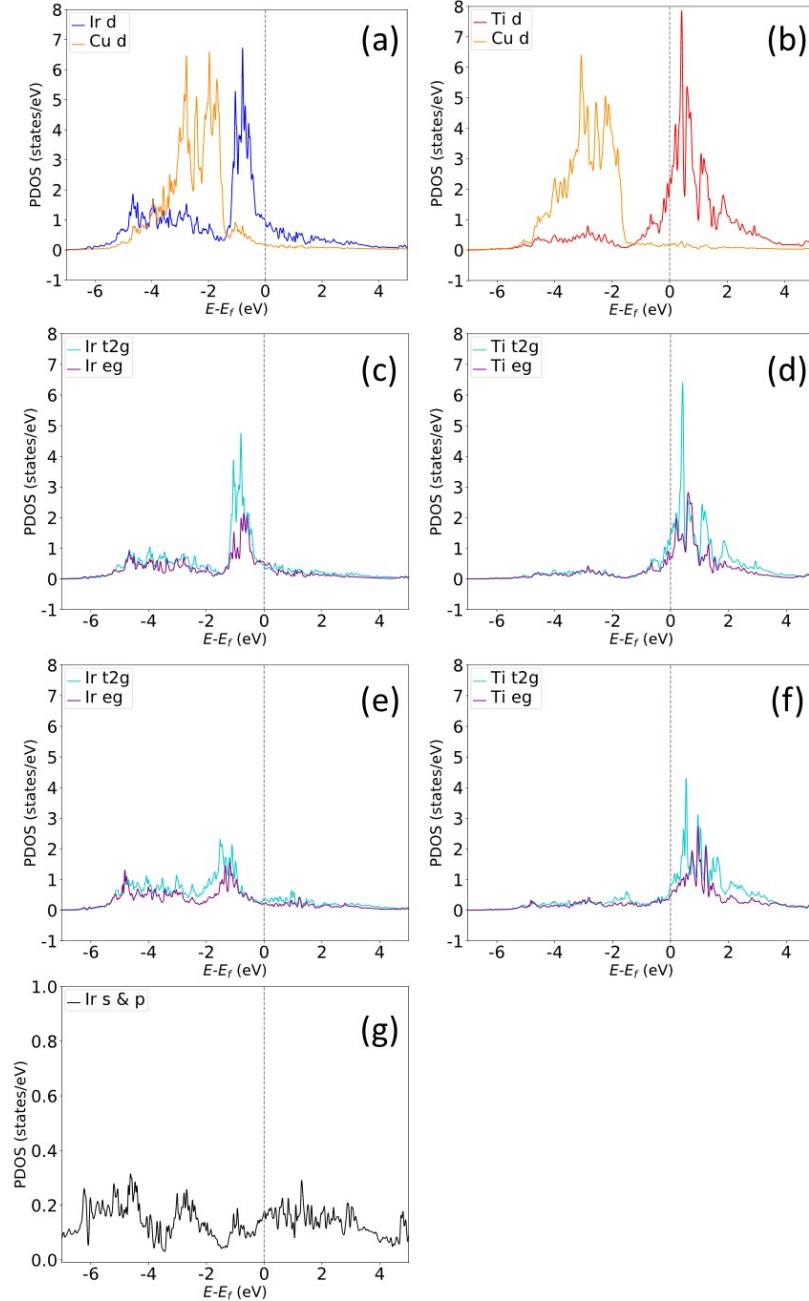

Fig. S1 **(a)** d-states of Ir and Cu in  $\text{Ir}_1\text{Cu}$ . **(b)** d-states of Ti and Cu in  $\text{Ti}_1\text{Cu}$ . **(c)**, **(d)** Symmetry-resolved pDOS of Ir in  $\text{Ir}_1\text{Cu}$  and Ti in  $\text{Ti}_1\text{Cu}$ . The overlaps exhibit nearly degenerated d states, indicating very small interactions with Cu. **(e)**, **(f)** Symmetry-resolved pDOS of Ir and Ti in  $\text{Ir}_1\text{Ti}_1\text{Cu}$ . Ir t<sub>2g</sub>-states shift to lower energies near -2 eV and Ti t<sub>2g</sub>-states shift to higher energies near 2 eV, as the Ir-Ti hybridization results in bonding and antibonding-like d-states. **(g)** s- and p-states of Ir in  $\text{Ir}_1\text{Cu}$ , which are smaller and broader than its d-states.

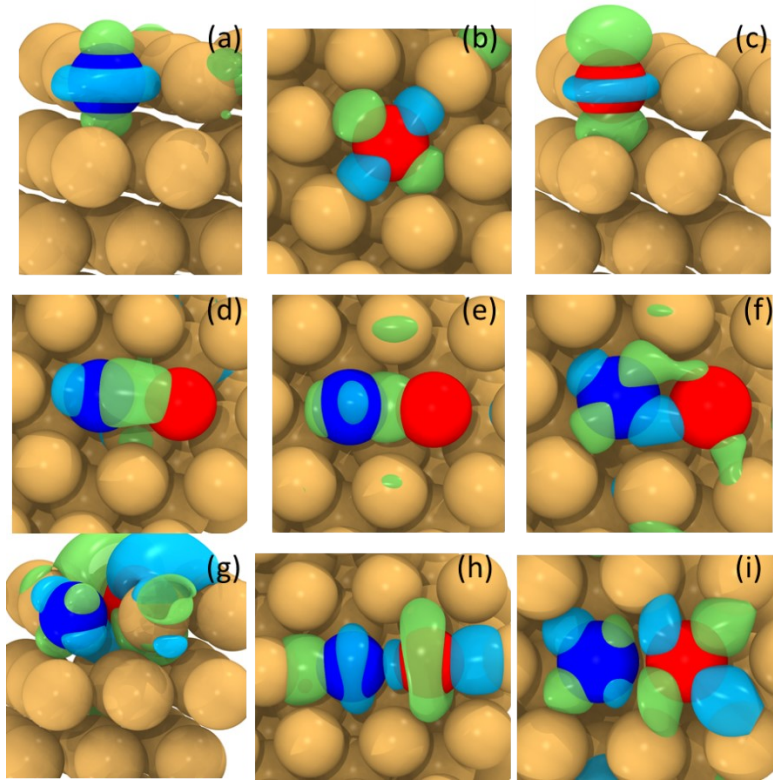

Fig. S2 Additional top views of calculated wavefunctions in  $\text{Ir}_1\text{Ti}_1\text{Cu}$  beyond those presented in Figure 1. (a) Ir  $d_{z^2}$  in  $\text{Ir}_1\text{Cu}$ . (b) Ti  $d_{x^2-y^2}$  in  $\text{Ti}_1\text{Cu}$ . (c) Ti  $d_{z^2}$  in  $\text{Ti}_1\text{Cu}$ . (d) - (f) Ir-Ti d-d  $\sigma$  and  $\pi$  states in  $\text{Ir}_1\text{Ti}_1\text{Cu}$ . (f) - (h) Ir-Ti d-d  $\delta^*$ ,  $\sigma^*$  and  $\pi^*$  states in  $\text{Ir}_1\text{Ti}_1\text{Cu}$ .

Table S1. Homodimer and heterodimer formation energies for  $M_1Pd_1Ag$ ,  $M_1Pd_1Au$ ,  $M_1Pt_1Ag$ , and  $M_1Ti_1Cu$  in eV.

| Dopant | $M_1Pd_1Ag$ |       | $M_1Pd_1Au$ |       | $M_1Pt_1Ag$ |       | $M_1Ti_1Cu$ |       |
|--------|-------------|-------|-------------|-------|-------------|-------|-------------|-------|
|        | Hetero-     | Homo- | Hetero-     | Homo- | Hetero-     | Homo- | Hetero-     | Homo- |
| Co     | -0.03       | -0.39 | 0.06        | -0.18 | -0.12       | -0.39 | -0.73       | -0.35 |
| Cr     | -0.07       | 0.14  | 0.09        | 0.29  | -0.19       | 0.14  | 0.03        | 0.02  |
| Cu     | 0.00        | 0.01  | 0.05        | 0.05  | -0.02       | 0.01  | /           | /     |
| Fe     | -0.07       | -0.40 | 0.05        | -0.05 | -0.21       | -0.40 | -0.51       | -0.40 |
| Hf     | -0.53       | -0.13 | -0.12       | 0.44  | -0.89       | -0.13 | 0.33        | 0.66  |
| Ir     | 0.03        | -0.20 | 0.14        | -0.14 | -0.04       | -0.20 | -0.83       | 0.08  |
| Mn     | -0.13       | 0.08  | 0.02        | 0.25  | -0.27       | 0.08  | -0.02       | 0.21  |
| Mo     | -0.17       | -3.05 | 0.04        | -2.01 | -0.38       | -3.05 | -0.99       | -2.08 |
| Ni     | 0.01        | -0.01 | 0.12        | 0.10  | -0.05       | -0.01 | -0.31       | 0.01  |
| Pd     | 0.03        | 0.03  | 0.13        | 0.13  | 0.03        | 0.03  | -0.20       | 0.16  |
| Pt     | 0.03        | 0.02  | 0.12        | 0.09  | 0.02        | 0.02  | -0.38       | 0.25  |
| Re     | -0.19       | -2.33 | 0.02        | -1.63 | -0.43       | -2.33 | -1.04       | -1.42 |
| Rh     | 0.05        | 0.04  | 0.17        | 0.13  | 0.00        | 0.04  | -0.71       | 0.19  |
| Ru     | 0.02        | -0.81 | 0.13        | -0.55 | -0.10       | -0.81 | -1.15       | -0.30 |
| Sc     | -0.38       | 0.30  | -0.06       | 0.64  | -0.66       | 0.30  | 0.47        | 0.82  |
| Ta     | -0.46       | -1.48 | -0.11       | -0.22 | -0.85       | -1.49 | -0.16       | -0.45 |
| Tc     | -0.14       | -3.69 | 0.04        | -3.44 | -0.33       | -3.70 | -1.30       | -1.38 |
| Ti     | -0.30       | -0.30 | -0.03       | 0.15  | -0.62       | -0.30 | 0.07        | 0.07  |
| V      | -0.13       | -0.64 | 0.07        | 0.15  | -0.32       | -0.64 | -0.13       | -0.58 |
| W      | -0.26       | -2.53 | -0.05       | -1.56 | -0.58       | -2.54 | -0.66       | -1.43 |

Table S2. DFT energies of CO adsorption on atop site of M in  $M_1H$  ( $E_{\text{ads(SAA)}}$ ), atop site of M in  $M_1M'_1H$  ( $E_{\text{ads(DAA, M)}}$ ), atop site of  $M'$  ( $E_{\text{ads(DAA, M')}}$ ) and bridge site ( $E_{\text{ads(DAA, Bri)}}$ ) in eV. The lowest energy site for each dual-atom case are in bold. Strong electronic effects are indicated if the CO top-site adsorption energy changes by more than 0.14 eV between the SAA and DAA. Strong ensemble effects are indicated if the bridge site is the most stable site on the DAA.

|                | SAAs<br>( $M_1H$ )                          | Dual-atom sites ( $M_1M'_1H$ )              |                                                 |                                             | Electronic<br>effect? | Ensemble<br>effect? |
|----------------|---------------------------------------------|---------------------------------------------|-------------------------------------------------|---------------------------------------------|-----------------------|---------------------|
|                | top CO<br>on M<br>( $E_{\text{ads(SAA)}}$ ) | top CO on M<br>( $E_{\text{ads(DAA, M)}}$ ) | top CO on $M'$<br>( $E_{\text{ads(DAA, M')}}$ ) | bridge CO<br>( $E_{\text{ads(DAA, Bri)}}$ ) |                       |                     |
| $Pd_1Ag$       | -1.32                                       |                                             |                                                 |                                             |                       |                     |
| $Ni_1(Pd_1)Ag$ | -1.88                                       | <b>-1.87</b>                                | -1.34                                           |                                             | strong                | weak                |
| $Cr_1(Pd_1)Ag$ | -1.27                                       | -1.27                                       | -1.34                                           | <b>-1.52</b>                                | weak                  | strong              |
| $Cu_1(Pd_1)Ag$ | -0.92                                       | -0.90                                       | <b>-1.35</b>                                    | -1.31                                       | weak                  | weak                |
| $Hf_1(Pd_1)Ag$ | -1.57                                       | -1.43                                       | -1.16                                           | <b>-1.51</b>                                | strong                | strong              |
| $Mn_1(Pd_1)Ag$ | -1.19                                       | -1.11                                       | -1.31                                           | <b>-1.39</b>                                | weak                  | strong              |
| $Sc_1(Pd_1)Ag$ | -1.05                                       | -0.98                                       | -1.25                                           | <b>-1.29</b>                                | weak                  | strong              |
| $Ti_1(Pd_1)Ag$ | -1.51                                       | -1.52                                       | -1.25                                           | <b>-1.60</b>                                | weak                  | strong              |
| $Pd_1Au$       | -1.20                                       |                                             |                                                 |                                             |                       |                     |
| $Hf_1(Pd_1)Au$ | -1.35                                       | -1.29                                       | -1.17                                           | <b>-1.37</b>                                | weak                  | strong              |
| $Sc_1(Pd_1)Au$ | -0.94                                       | -0.91                                       | <b>-1.25</b>                                    | -1.19                                       | weak                  | weak                |
| $Ti_1(Pd_1)Au$ | -1.41                                       | -1.37                                       | -1.23                                           | <b>-1.49</b>                                | weak                  | strong              |
| $Ti_1Cu$       | -1.42                                       |                                             |                                                 |                                             |                       |                     |
| $Ru_1(Ti_1)Cu$ | -2.63                                       | <b>-2.26</b>                                | -1.20                                           | / <sup>a</sup>                              | strong                | weak                |
| $Ir_1(Ti_1)Cu$ | -2.52                                       | <b>-2.22</b>                                | -1.29                                           | / <sup>a</sup>                              | strong                | weak                |
| $Co_1(Ti_1)Cu$ | -2.44                                       | <b>-2.28</b>                                | -1.28                                           | / <sup>a</sup>                              | strong                | weak                |
| $Rh_1(Ti_1)Cu$ | -2.18                                       | <b>-1.94</b>                                | -1.42                                           | / <sup>a</sup>                              | strong                | weak                |
| $Fe_1(Ti_1)Cu$ | -2.02                                       | <b>-2.33</b>                                | / <sup>a</sup>                                  | / <sup>a</sup>                              | strong                | weak                |
| $Ni_1(Ti_1)Cu$ | -1.80                                       | <b>-1.72</b>                                | -1.37                                           | -1.72                                       | weak                  | weak                |
| $Pt_1(Ti_1)Cu$ | -1.59                                       | -1.40                                       | <b>-1.50</b>                                    | -1.39                                       | strong                | weak                |
| $Mn_1(Ti_1)Cu$ | -1.42                                       | <b>-2.14</b>                                | -1.28                                           | / <sup>a</sup>                              | strong                | weak                |
| $Pd_1(Ti_1)Cu$ | -1.29                                       | -1.19                                       | <b>-1.51</b>                                    | -1.47                                       | weak                  | weak                |

<sup>a</sup> CO transfers to the lowest energy site

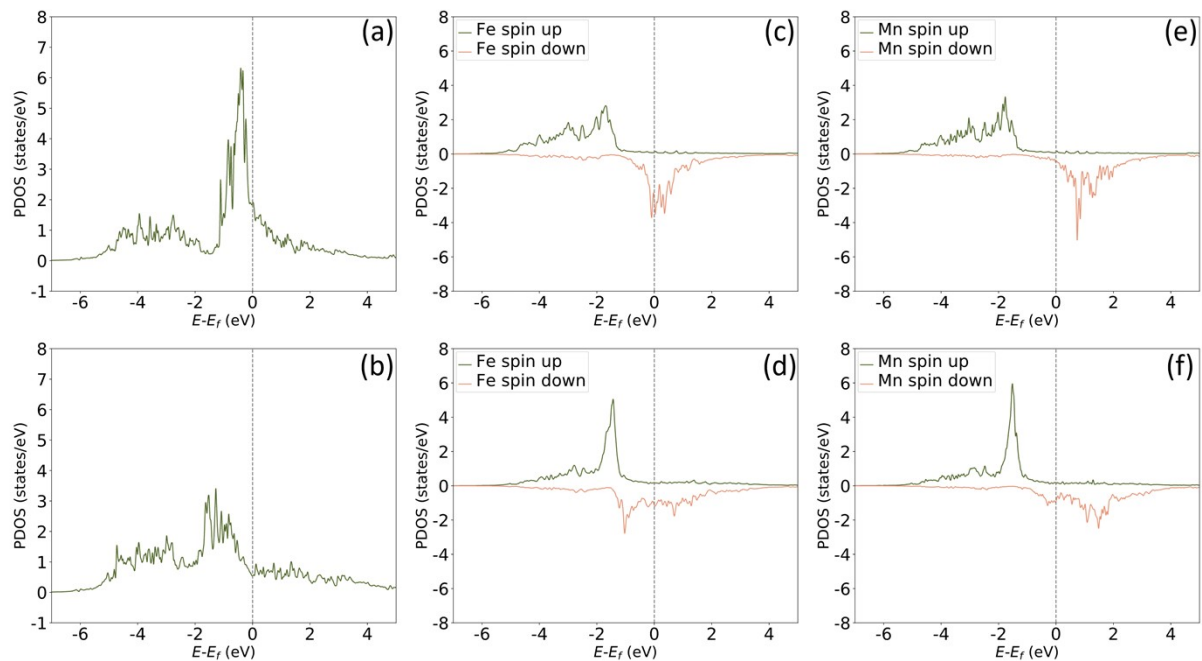

Fig. S3 pDOS of d-states of Ru, Fe, and Mn in **(a)** Ru<sub>1</sub>Cu; **(b)** Ru<sub>1</sub>Ti<sub>1</sub>Cu; **(c)** Fe<sub>1</sub>Cu; **(d)** Fe<sub>1</sub>Ti<sub>1</sub>Cu; **(e)** Mn<sub>1</sub>Cu and **(f)** Mn<sub>1</sub>Ti<sub>1</sub>Cu. The shape and d-band center are significantly changed from SAAs **(a, c, e)** to dual-atom alloy sites **(b, d, f)**, showing significant electronic effects.

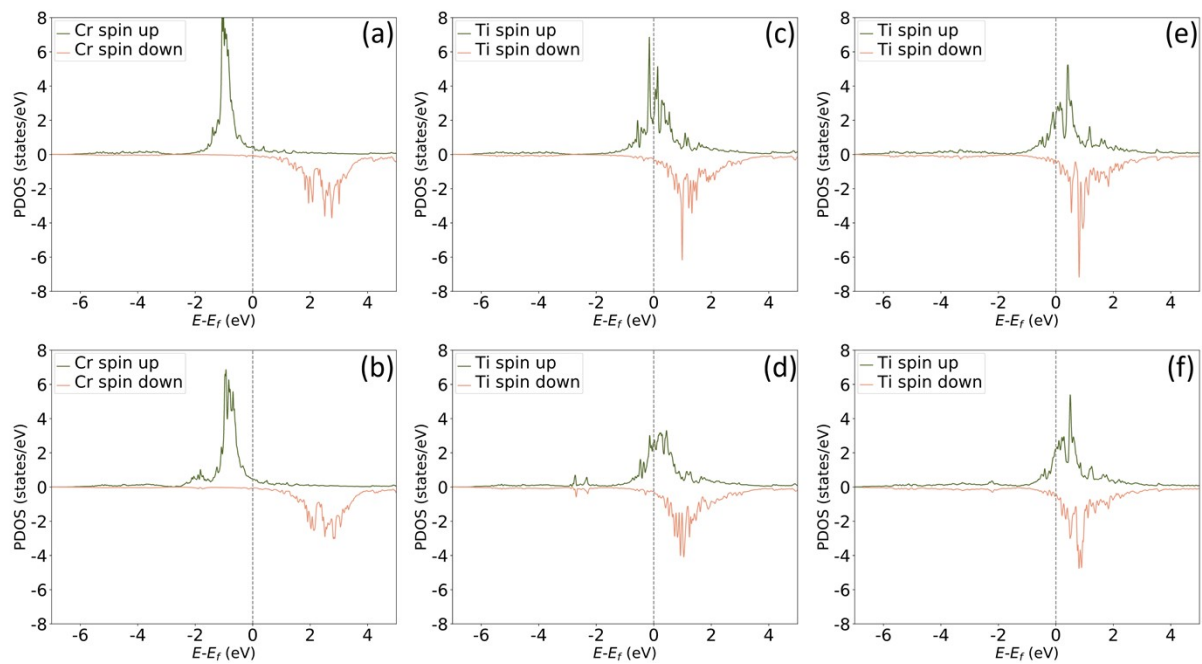

Fig. S4 pDOS of d-states of Cr and Ti in **(a)**  $\text{Cr}_1\text{Ag}$ ; **(b)**  $\text{Cr}_1\text{Pd}_1\text{Ag}$ ; **(c)**  $\text{Ti}_1\text{Ag}$ ; **(d)**  $\text{Ti}_1\text{Pd}_1\text{Ag}$ ; **(e)**  $\text{Ti}_1\text{Au}$  and **(f)**  $\text{Ti}_1\text{Pd}_1\text{Au}$ . The shape and d-band center are almost identical between SAAs **(a, c, e)** and dual-atom alloy sites **(b, d, f)**, showing negligible electronic effects.
